# Supplementary material for: Harzianumnones A and B: two hydroxyanthraquinones from the coral-derived fungusTrichoderma harzianum
Source: Royal Society of Chemistry journal article supplement (doi:10.1039/c8ra04865g), 2018-01-01
Supplement: c8ra04865g1.pdf [file c8ra04865g1.pdf]

## *Supporting Information*

### **Harzianumnones A and B: two hydroxyanthraquinones from the coral-derived fungus *Trichoderma harzianum***

Ting Shi,<sup>a,b</sup> Xue-Mei Hou,<sup>a,b</sup> Zhi-Yong Li,<sup>c</sup> Fei Cao,<sup>d</sup> Ya-Hui Zhang,<sup>a,b</sup> Jia-Yin Yu,<sup>a,b</sup>  
Dong-Lin Zhao,<sup>a,b</sup> Chang-Lun Shao,<sup>\*a,b</sup> and Chang-Yun Wang,<sup>\*a,b,e</sup>

#### **Affiliation**

<sup>a</sup> Key Laboratory of Marine Drugs, The Ministry of Education of China, School of Medicine and Pharmacy, Ocean University of China, Qingdao 266003, People's Republic of China

<sup>b</sup> Laboratory for Marine Drugs and Bioproducts, Qingdao National Laboratory for Marine Science and Technology, Qingdao 266071, People's Republic of China

<sup>c</sup> Marine Biotechnology Laboratory, State Key Laboratory of Microbial Metabolism, School of Life Sciences & Biotechnology, Shanghai Jiao Tong University, Shanghai 200240, People's Republic of China

<sup>d</sup> Key Laboratory of Pharmaceutical Quality Control of Hebei Province, College of Pharmaceutical Sciences, Hebei University, Baoding 071002, People's Republic of China.

<sup>e</sup> Institute of Evolution & Marine Biodiversity, Ocean University of China, Qingdao 266003, People's Republic of China

#### **Correspondence**

\* To whom correspondence should be addressed.

Tel/Fax: +86-531-82031536 (C.-Y. Wang); +86-532-82031381 (C.-L. Shao)

E-mail: changyun@ouc.edu.cn (C.-Y. Wang); shaochangelun@ouc.edu.cn (C.-L. Shao)

## List of Supporting Information

- Figure S1.**  $^1\text{H}$  NMR spectrum of compound **1** (DMSO- $d_6$ ).
- Figure S2.**  $^1\text{H}$  NMR spectrum of compound **1** at the condition of spin (DMSO- $d_6$ ).
- Figure S3.** Partial  $^1\text{H}$  NMR spectrum of compound **1** at the condition of spin (DMSO- $d_6$ ).
- Figure S4.**  $^{13}\text{C}$  NMR spectrum of compound **1** (DMSO- $d_6$ ).
- Figure S5.** COSY spectrum of compound **1** (DMSO- $d_6$ ).
- Figure S6.** HSQC spectrum of compound **1** (DMSO- $d_6$ ).
- Figure S7.** HMBC spectrum of compound **1** (DMSO- $d_6$ ).
- Figure S8.** NOESY spectrum of compound **1** (DMSO- $d_6$ ).
- Figure S9.** ESIMS spectrum of compound **1**.
- Figure S10.** HRESIMS spectrum of compound **1**.
- Figure S11.**  $^1\text{H}$  NMR spectrum of compound **2** (DMSO- $d_6$ ).
- Figure S12.**  $^{13}\text{C}$  NMR spectrum of compound **2** (DMSO- $d_6$ ).
- Figure S13.** COSY spectrum of compound **2** (DMSO- $d_6$ ).
- Figure S14.** HSQC spectrum of compound **2** (DMSO- $d_6$ ).
- Figure S15.** HMBC spectrum of compound **2** (DMSO- $d_6$ ).
- Figure S16.** NOESY spectrum of compound **2** (DMSO- $d_6$ ).
- Figure S17.** ESIMS spectrum of compound **2**.
- Figure S18.** HRESIMS spectrum of compound **2**.
- Figure S19.** DNA Topo I inhibitory activity of compounds **5–9**.
- Table S1.** Cytotoxic activity for compounds **5, 7** and **8**.

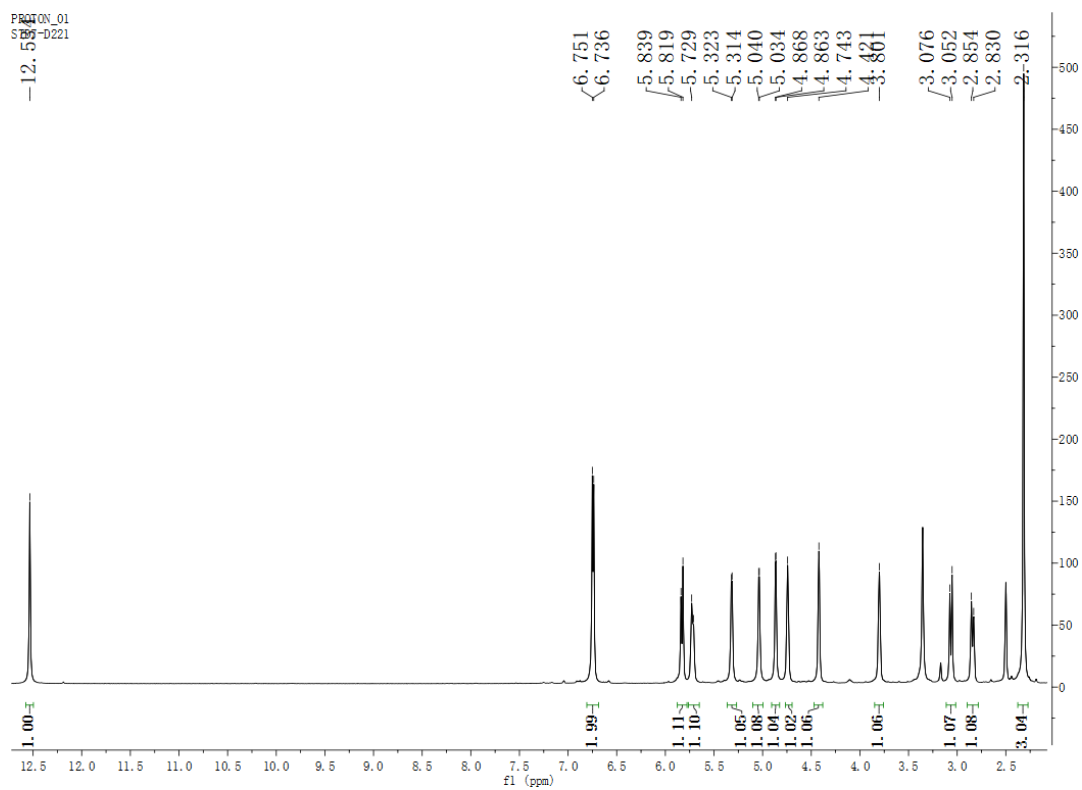

**Figure S1.**  $^1\text{H}$  NMR spectrum of compound **1** ( $\text{DMSO-}d_6$ ).

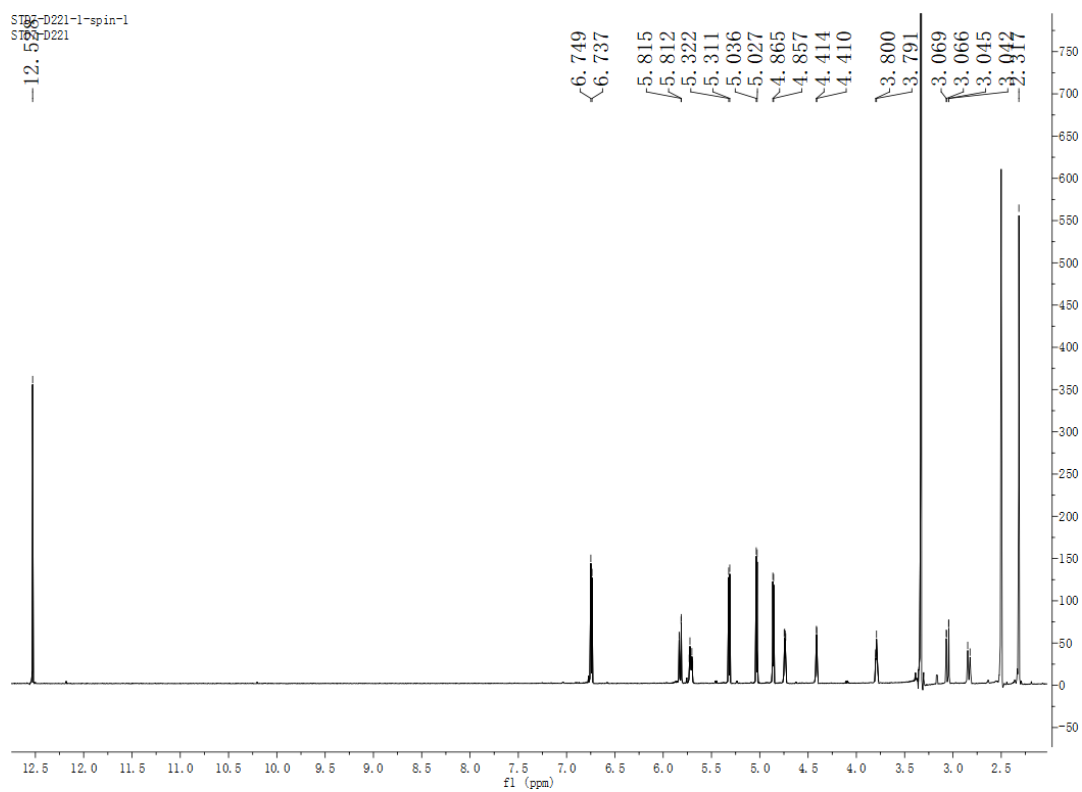

**Figure S2.**  $^1\text{H}$  NMR spectrum of compound **1** at the condition of spin ( $\text{DMSO-}d_6$ ).

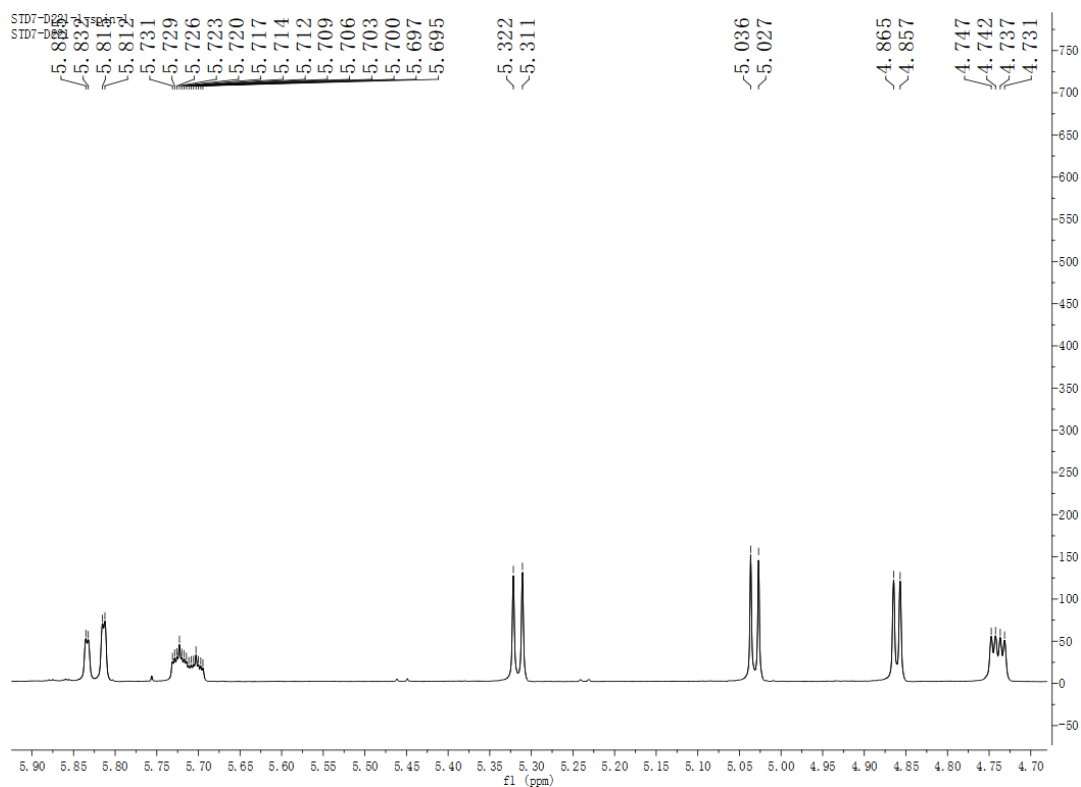

**Figure S3.** Partial  $^1\text{H}$  NMR spectrum of compound **1** at the condition of spin ( $\text{DMSO-}d_6$ ).

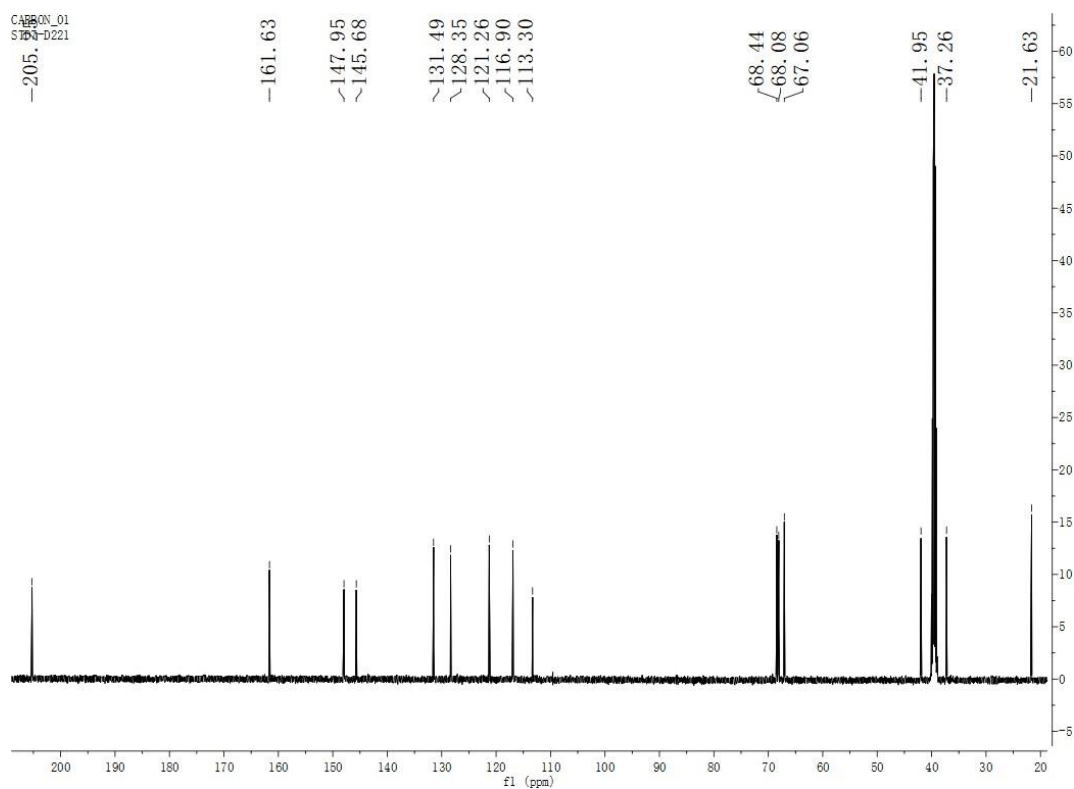

**Figure S4.**  $^{13}\text{C}$  NMR spectrum of compound **1** ( $\text{DMSO-}d_6$ ).

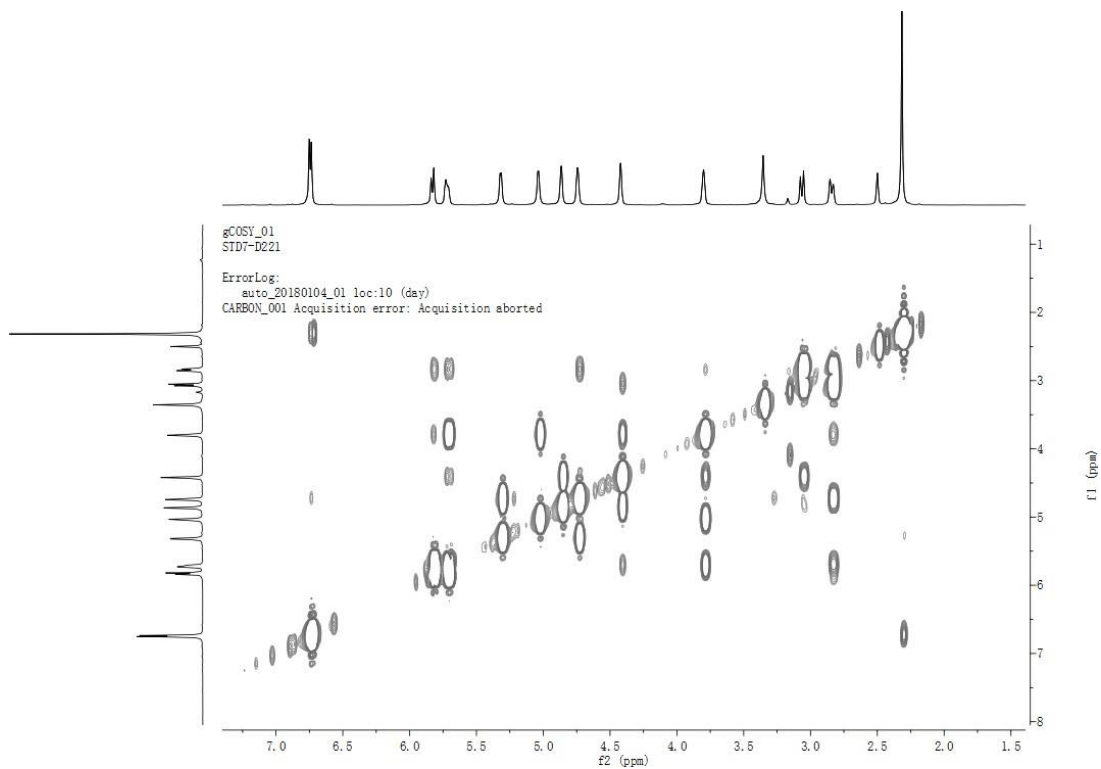

**Figure S5.** COSY spectrum of compound **1** (DMSO- $d_6$ ).

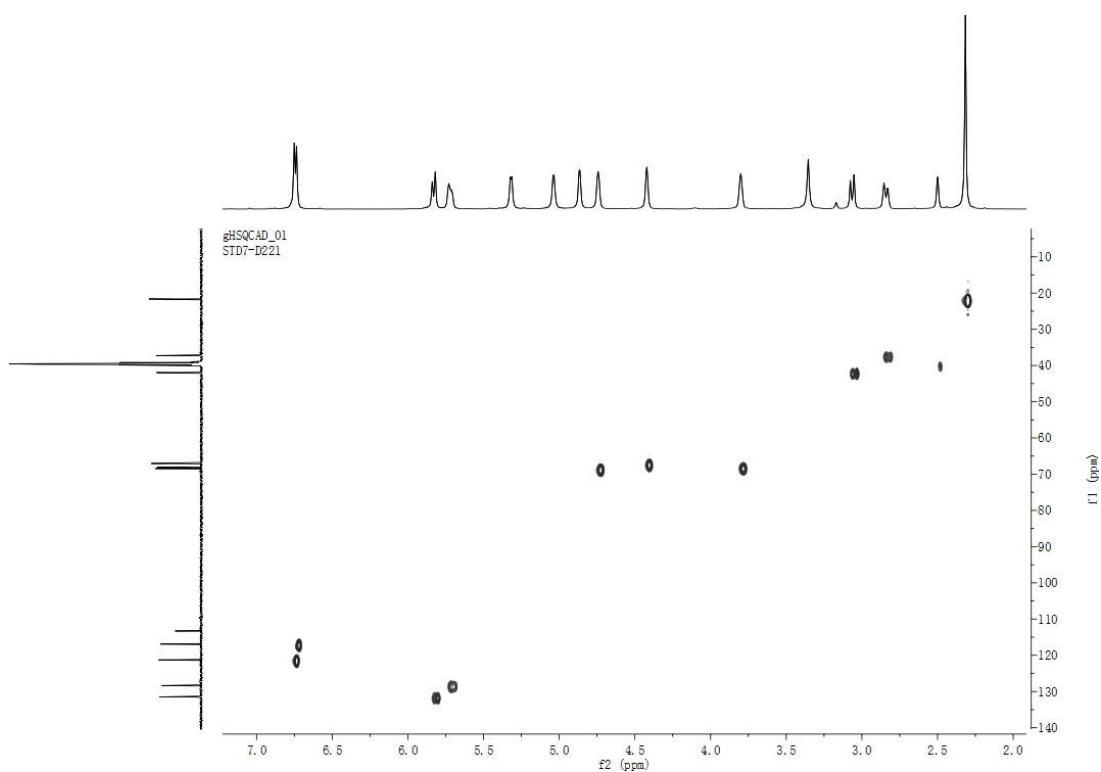

**Figure S6.** HSQC spectrum of compound **1** (DMSO- $d_6$ ).

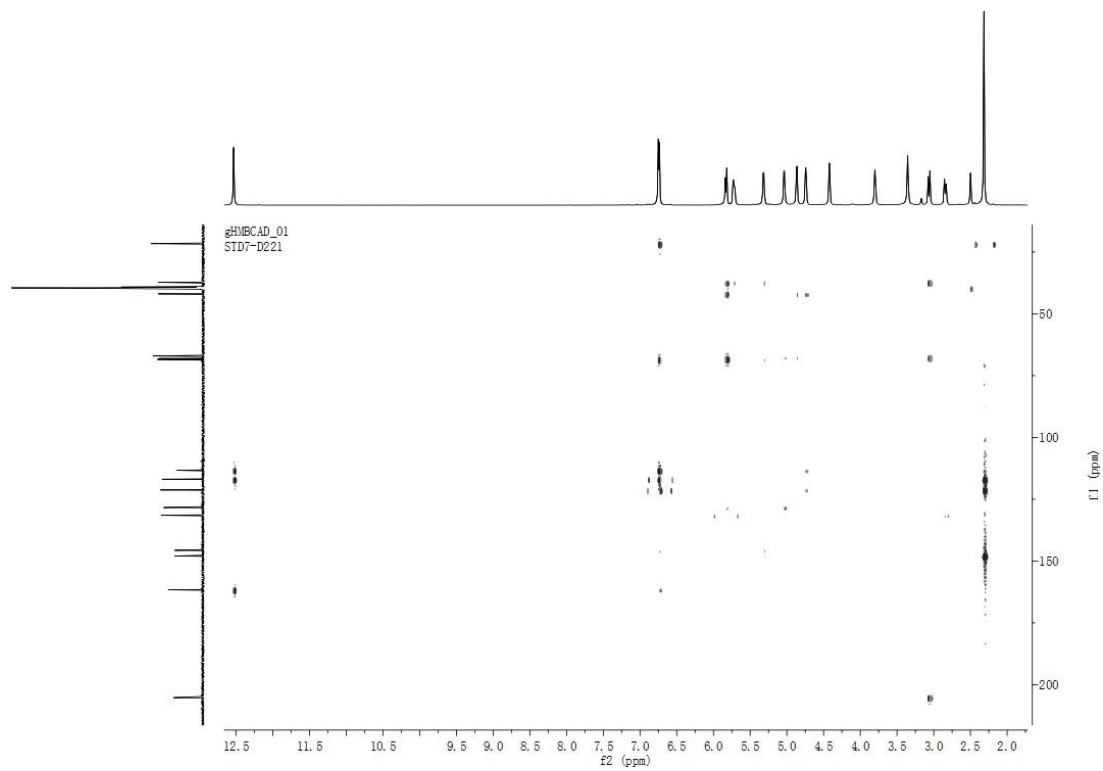

**Figure S7.** HMBC spectrum of compound **1** (DMSO- $d_6$ ).

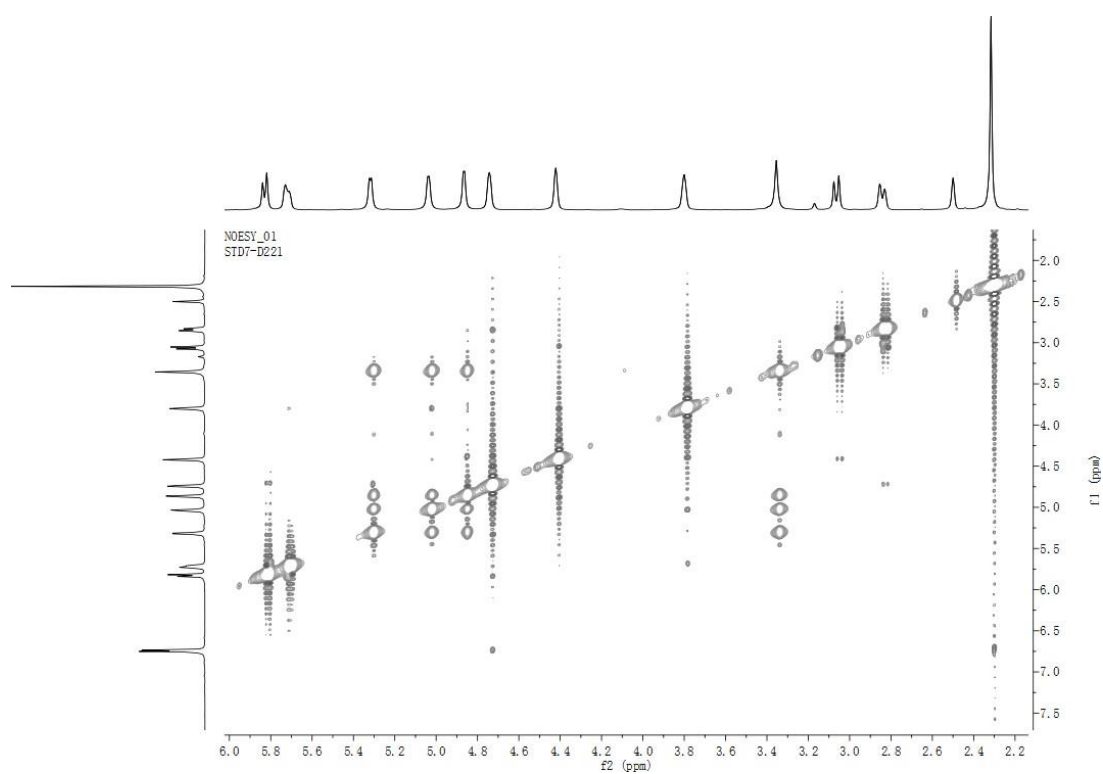

**Figure S8.** NOESY spectrum of compound **1** (DMSO- $d_6$ ).

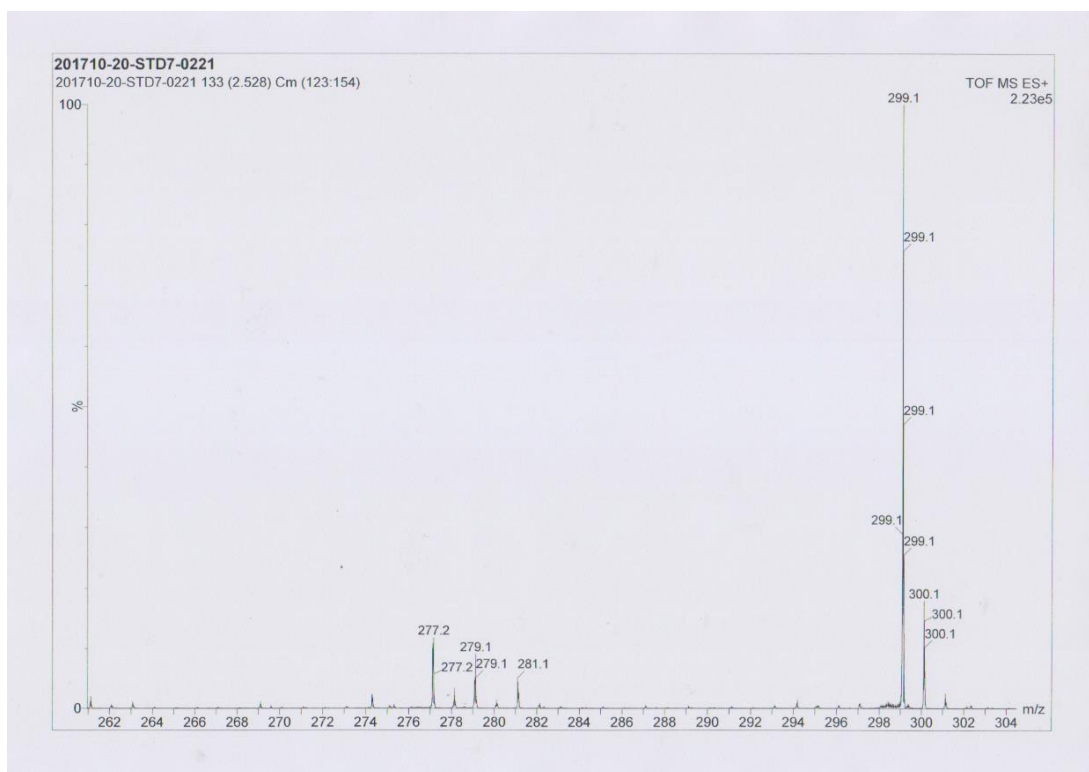

**Figure S9.** ESIMS spectrum of compound **1**.

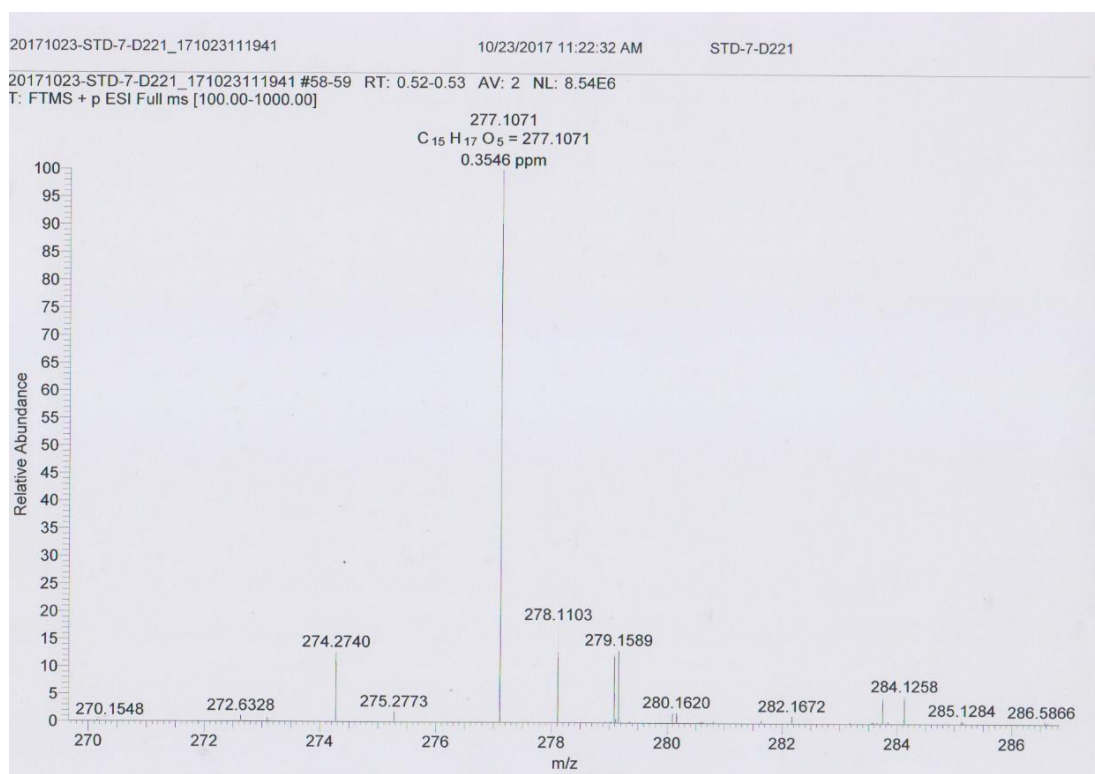

**Figure S10.** HRESIMS spectrum of compound **1**.

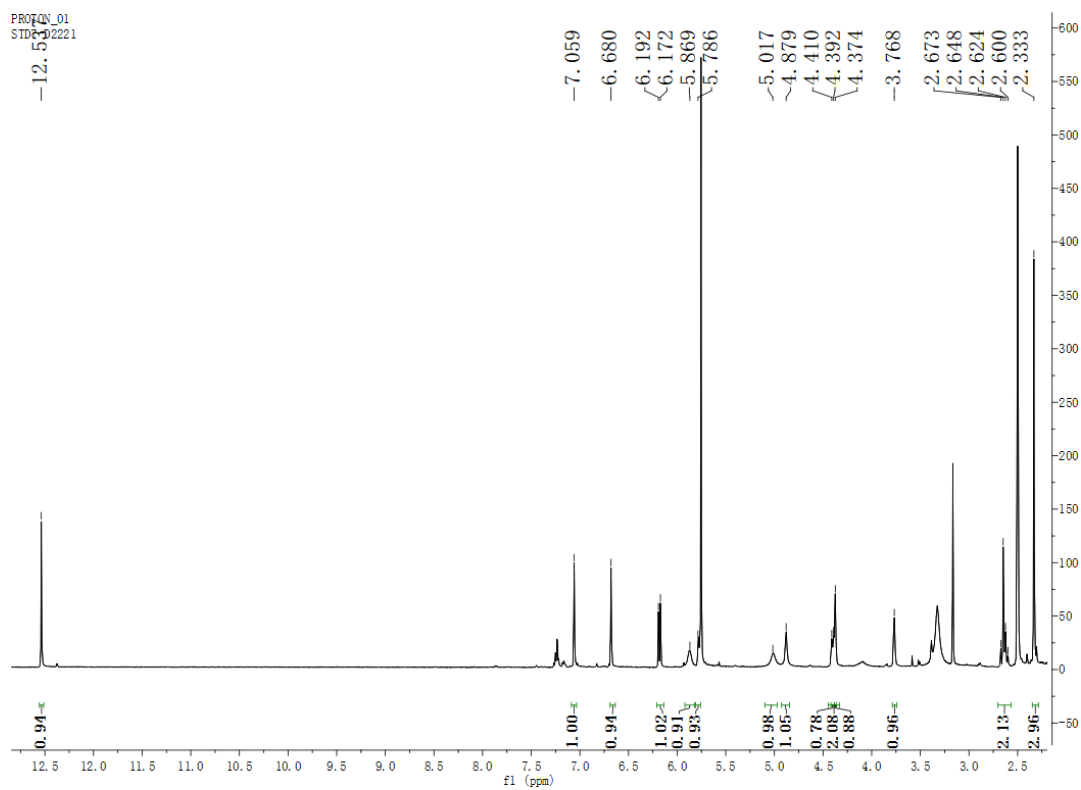

**Figure S11.**  $^1\text{H}$  NMR spectrum of compound **2** ( $\text{DMSO-}d_6$ ).

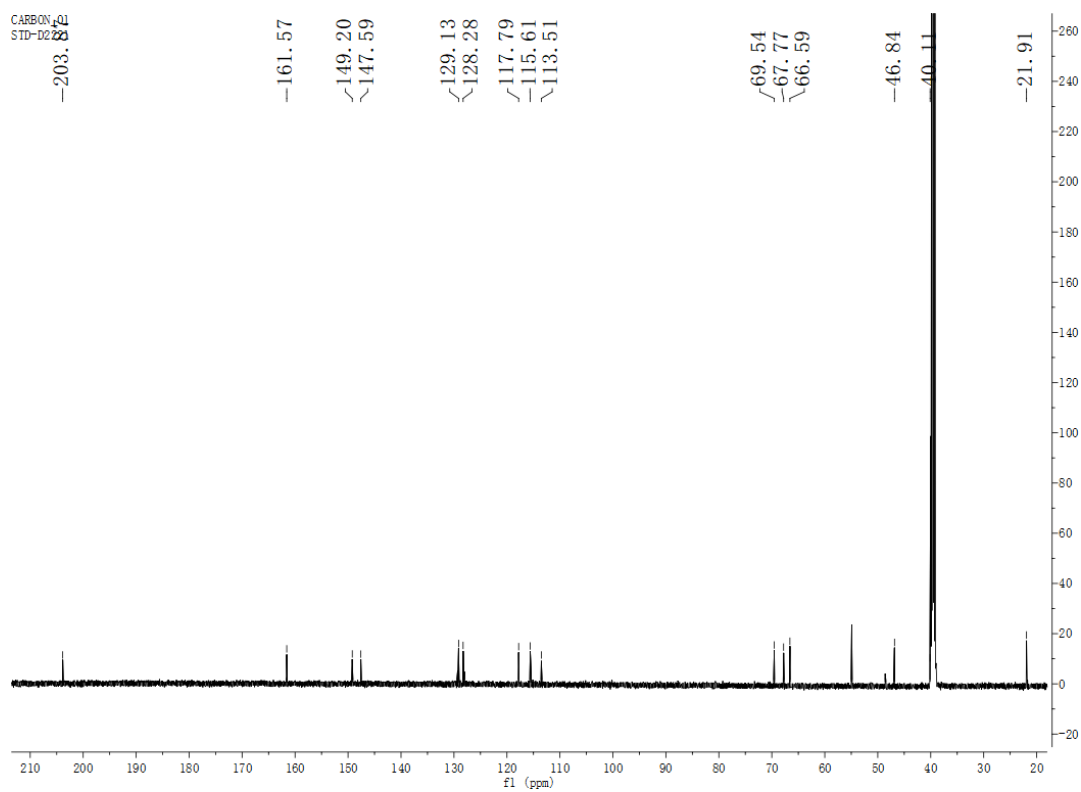

**Figure S12.**  $^{13}\text{C}$  NMR spectrum of compound **2** ( $\text{DMSO-}d_6$ ).



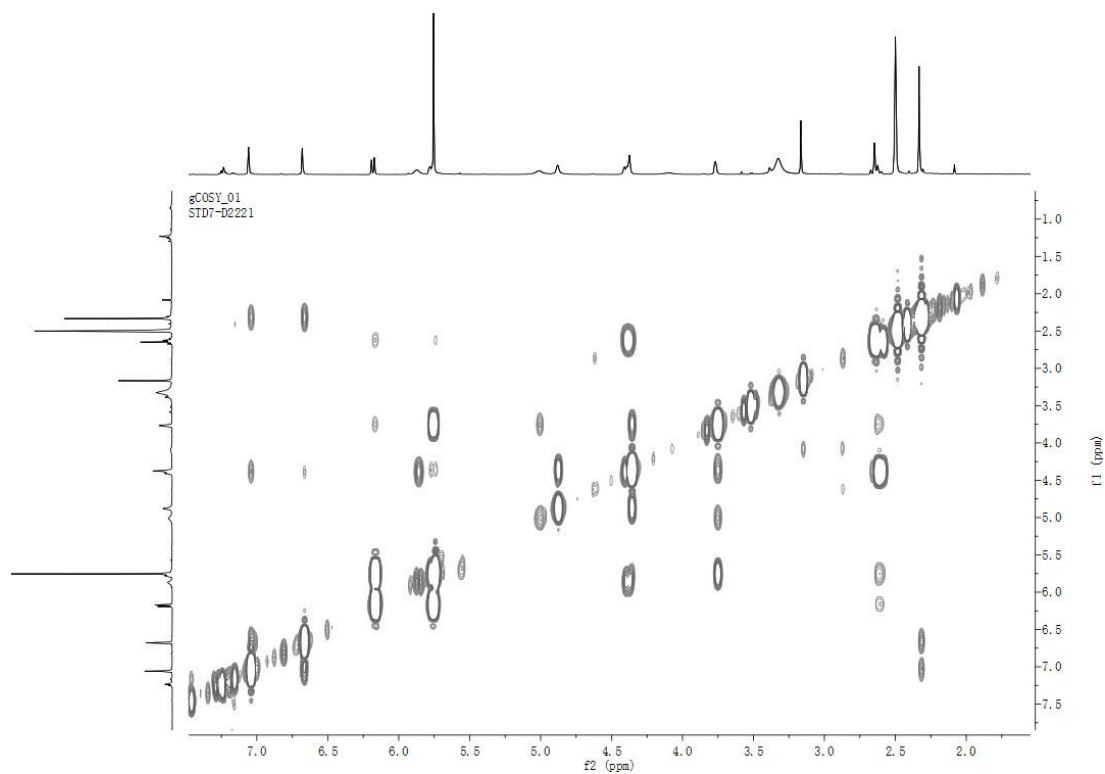

**Figure S13.** COSY spectrum of compound **2** (DMSO-*d*<sub>6</sub>).

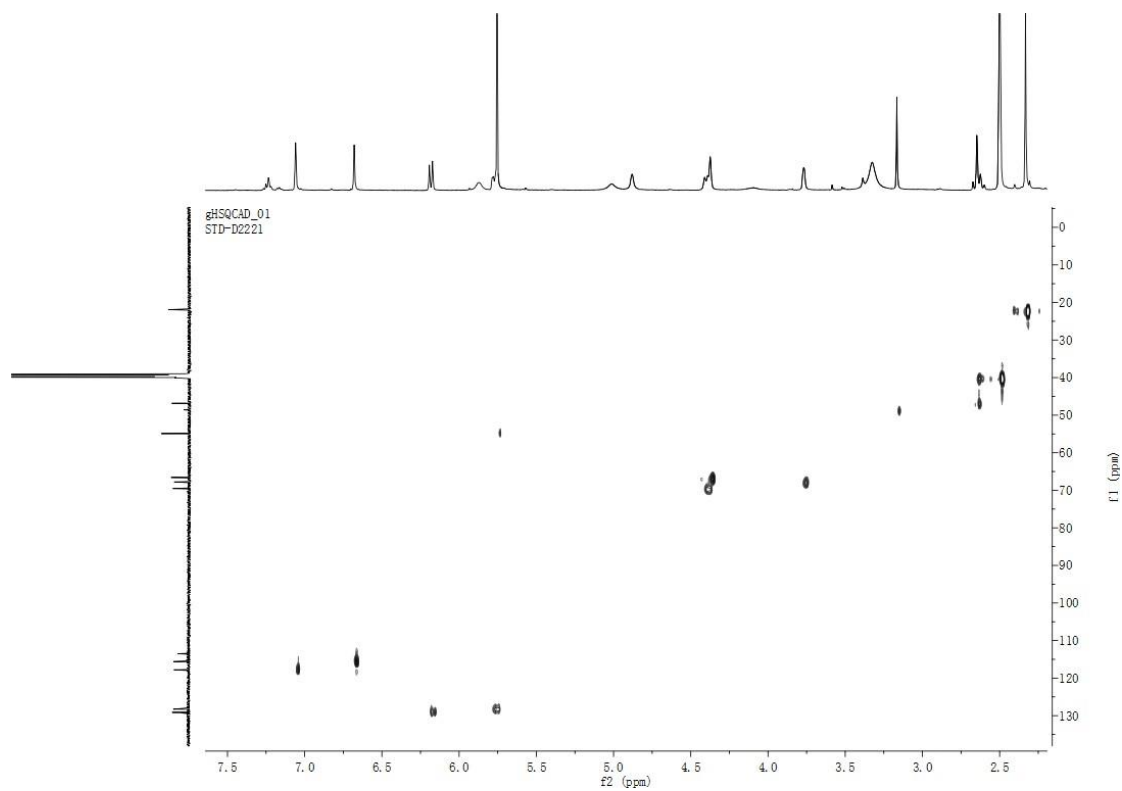

**Figure S14.** HSQC spectrum of compound **2** (DMSO-*d*<sub>6</sub>).

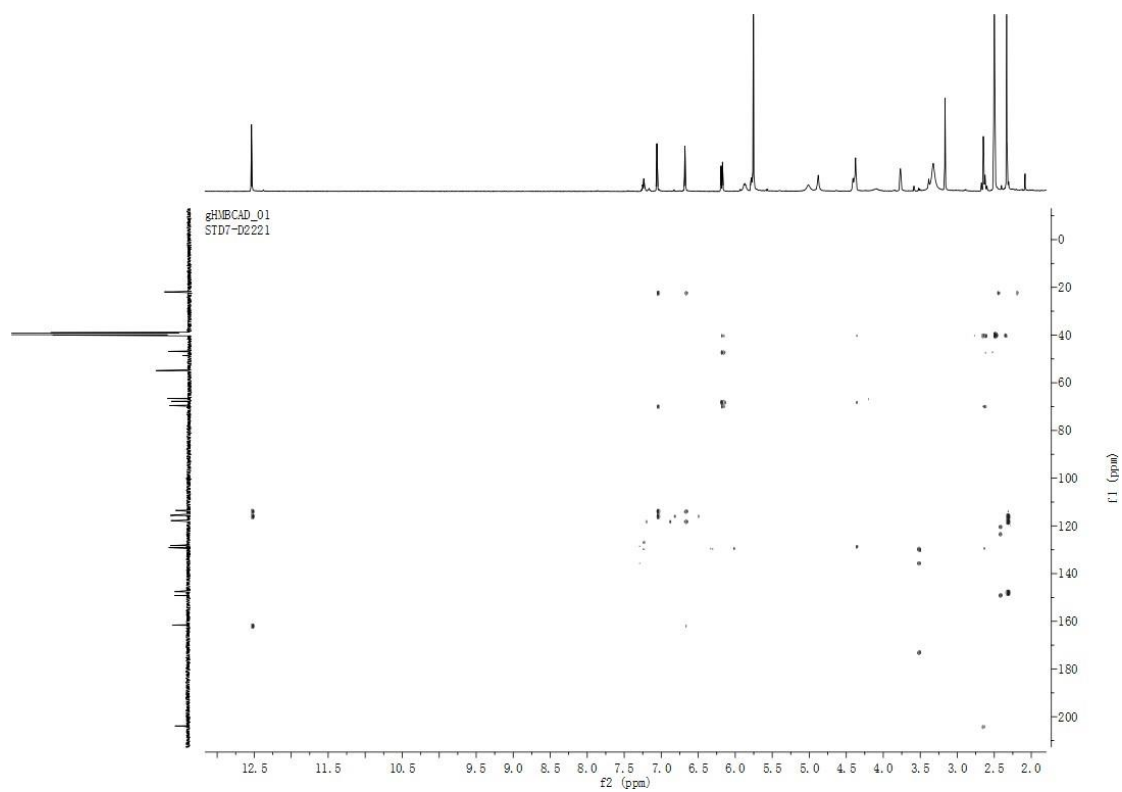

**Figure S15.** HMBC spectrum of compound **2** (DMSO- $d_6$ ).

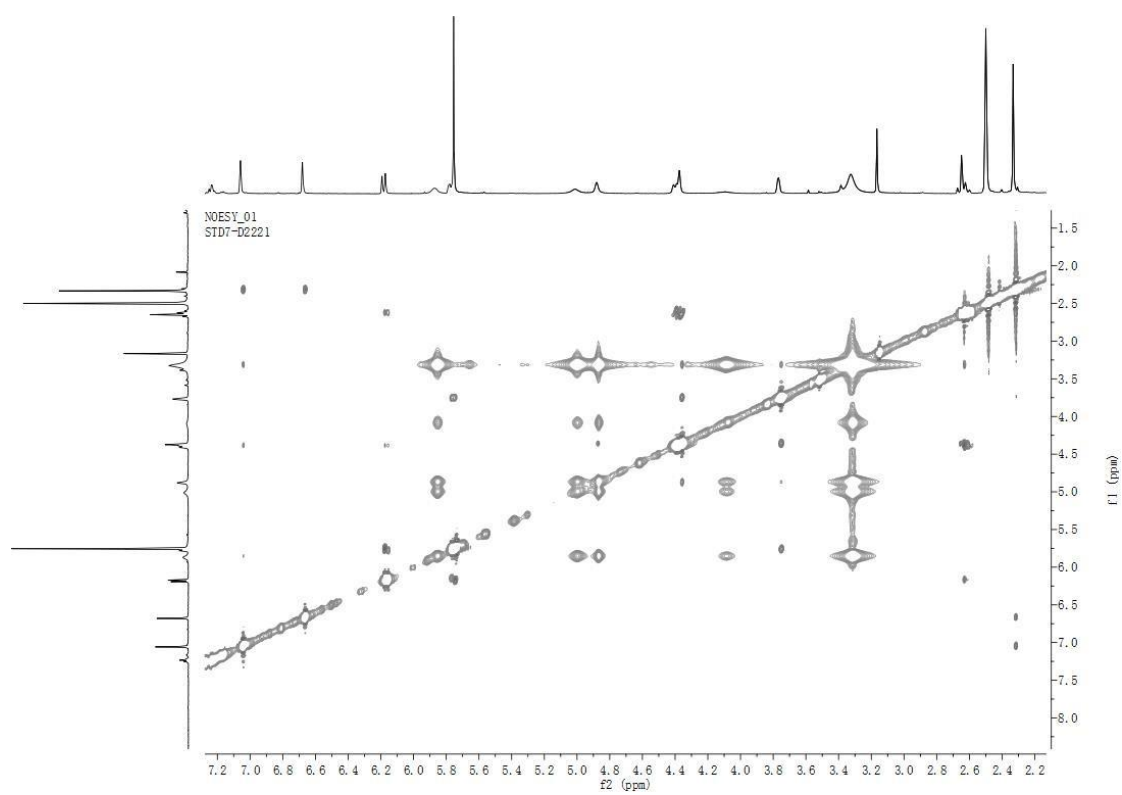

**Figure S16.** NOESY spectrum of compound **2** (DMSO- $d_6$ )

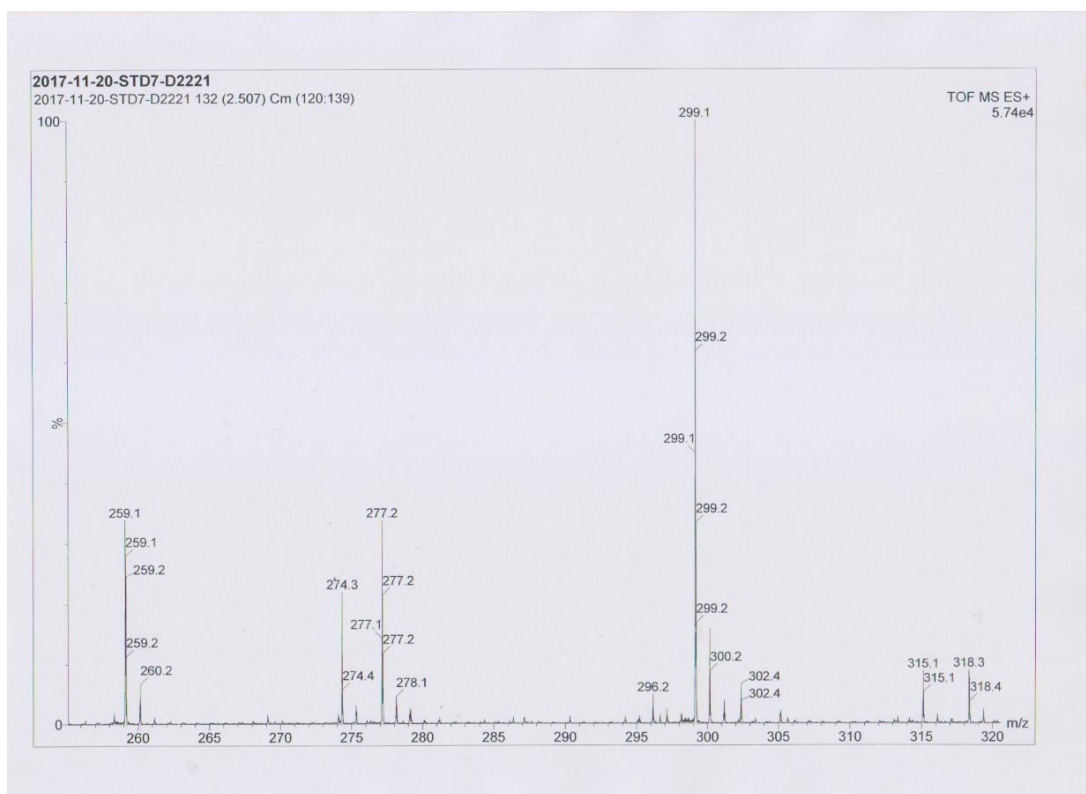

**Figure S17.** ESIMS spectrum of compound 2.

201801011-STD7-D2221\_180111142417 #8 RT: 0.06 AV: 1 NL: 1.85E6  
T: FTMS + p ESI Full ms [200.00-2000.00]

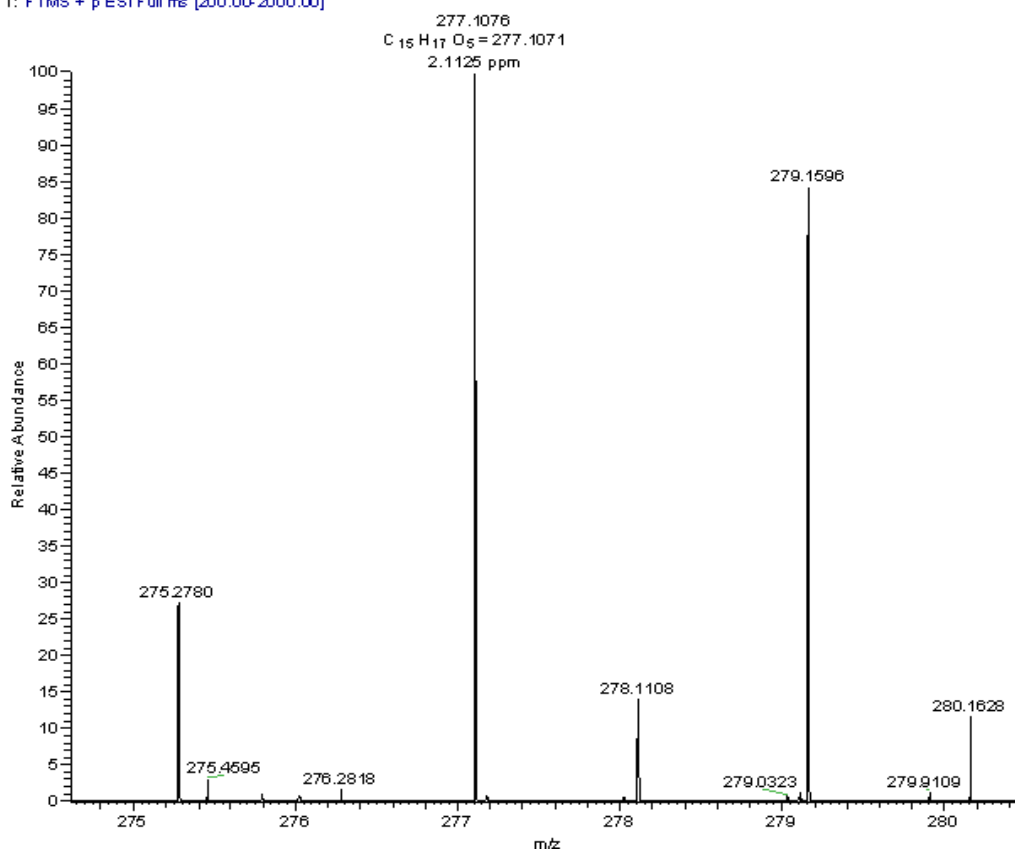

**Figure S18.** HRESIMS spectrum of compound 2.

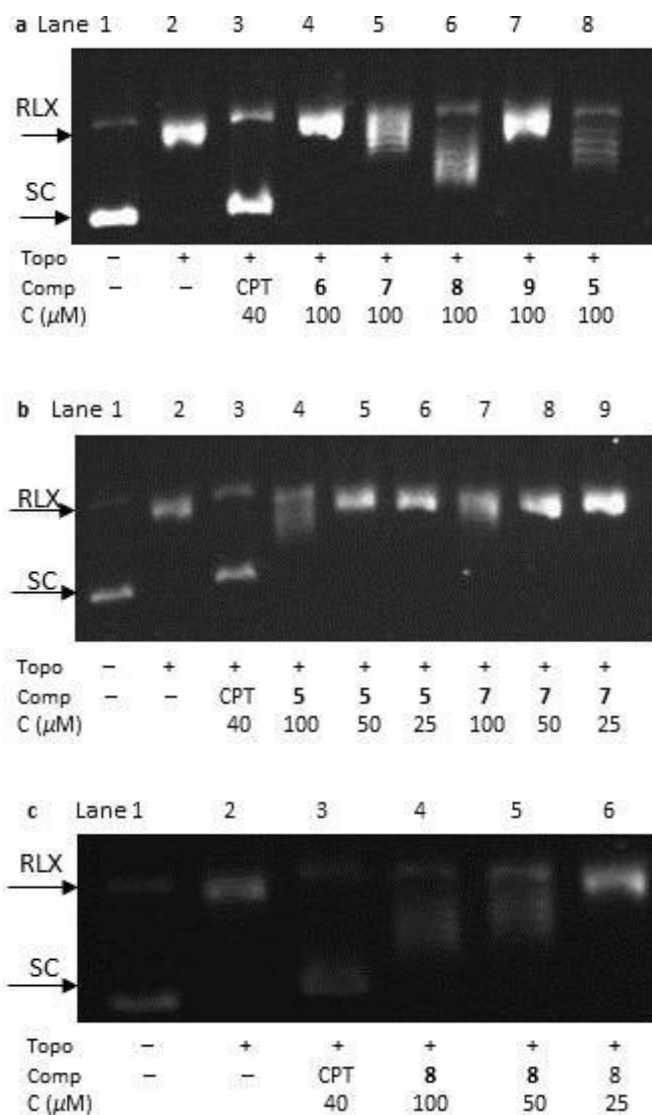

**Figure S19.** DNA Topo I inhibitory activity of compounds **5–9**. RLX: relaxed form; SC: supercoiled form; CPT: Camptothecin.

**Table S1** Cytotoxic activity for compounds **5**, **7** and **8**

| Compound                | IC <sub>50</sub> (µM) |       |       |        |       |        |
|-------------------------|-----------------------|-------|-------|--------|-------|--------|
|                         | HCT-116               | SW480 | A549  | HepG2  | Hela  | PANC-1 |
| <b>5</b>                | 35.3                  | 28.6  | >50   | 13.6   | >50   | >50    |
| <b>7</b>                | >50                   | 39.0  | >50   | 2.10   | 8.59  | >50    |
| <b>8</b>                | 29.8                  | >50   | 34.5  | 9.39   | 22.6  | 27.2   |
| Adriamycin <sup>a</sup> | 0.206                 | 0.590 | 0.157 | 0.0365 | 0.602 | 0.498  |

<sup>a</sup> Adriamycin was used as a positive control.
